# Supplementary material
Source: PubMed Central journal article supplement (PMC7478161)
Supplement: MD-010-C9MD00305C-s001.pdf [file MD-010-C9MD00305C-s001.pdf]

Supplementary Information

## The cytotoxic potential of cationic triangulenes against tumour cells

*Euphemia Leung,<sup>1</sup> Lisa I. Pilkington,<sup>2</sup> Mohinder M. Naiya,<sup>2</sup> David Barker,<sup>2</sup>  
Ayesha Zafar,<sup>2</sup> Chatchakorn Eurtivong,<sup>3</sup> and Jóhannes Reynisson<sup>\*2,4</sup>*

<sup>1</sup> Auckland Cancer Society Research Centre, University of Auckland, Grafton, Auckland  
1023, New Zealand

<sup>2</sup> School of Chemical Sciences, University of Auckland, City Centre, Auckland 1010, New  
Zealand

<sup>3</sup> Program of Chemical Biology, Chulabhorn Graduate Institute, Chulabhorn Royal  
Academy of Science, Bangkok 10210, Thailand

<sup>4</sup> School of Pharmacy, Keele University, Hornbeam building, Staffordshire ST5 5BG,  
United Kingdom

### Index

**Fig. S1** Relative anti-proliferative activity of **TOTA** and its derivatives against the breast MDA-MB-231 and colon HCT116 cancer cell lines. The mean percentages (%) at 10  $\mu$ M as compared to untreated cells at 100% growth using DMSO as a negative control.....2

**Fig. S2** IC<sub>50</sub> values for HCT116 cell line cultured as monolayer or spheroid are represented on the y-axis. The highest drug concentration is depicted where 50% growth inhibition was not reached. **TOTA** does not have a response in the concentration range used.....2

**Fig. S3** The results of the flow cytometry experiments at 16 h using MDA-MB-231.....3

**Table S1.** Criteria of lead-like, drug-like and known drug space (KDS) in terms of molecular descriptors...3

**Table S2.** The single point and zero point corrected vibrational energies (ZPE) of the optimised structures in hartrees (a.u.) in vacuum and the water simulation.....4

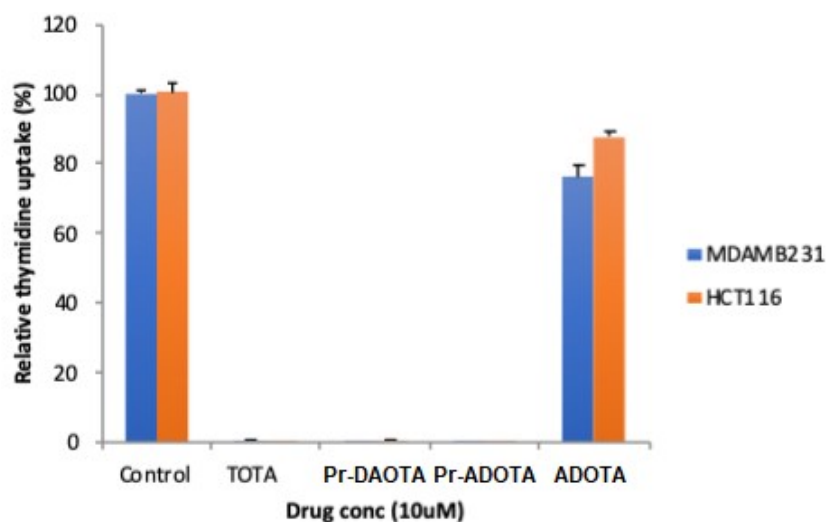

**Fig. S1** Relative anti-proliferative activity of **TOTA** and its derivatives against the breast MDA-MB-231 and colon HCT116 cancer cell lines. The mean percentages (%) at 10  $\mu$ M as compared to untreated cells at 100% growth using DMSO as a negative control.

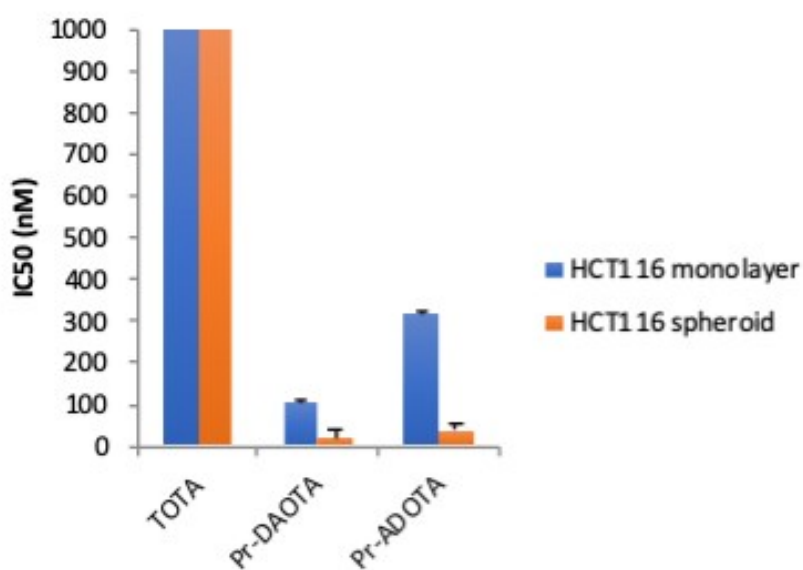

**Fig. S2** IC<sub>50</sub> values for HCT116 cell line cultured as monolayer or spheroid are represented on the y-axis. The highest drug concentration is depicted where 50% growth inhibition was not reached. **TOTA** does not have a response in the concentration range used.

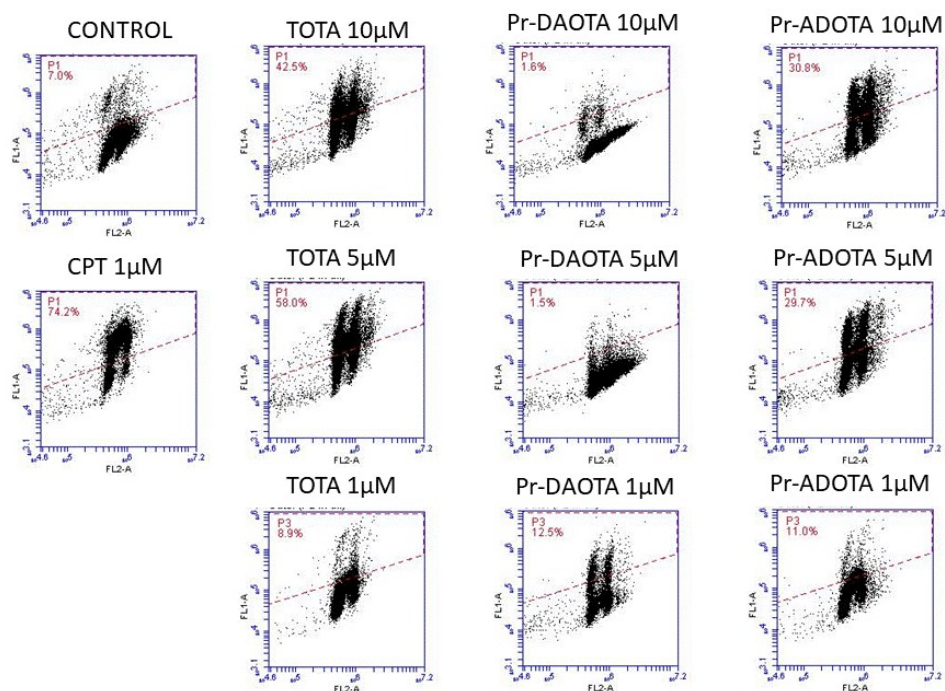

**Fig. S3** The results of the flow cytometry experiments at 16 h using MDA-MB-231. Cellular immunofluorescence (anti- $\gamma$ -H2AX antibody; y-axis) is plotted against DNA content (propidium iodide staining; x-axis). The upper portion (marked) represents high  $\gamma$ -H2AX phosphorylation and the proportion of the total (% cells) is indicated.

**Table S1.** Criteria of lead-like, drug-like and known drug space (KDS) in terms of molecular descriptors.

|                                             | Lead-like Space | Drug-like Space | Known Drug Space |
|---------------------------------------------|-----------------|-----------------|------------------|
| Molecular weight ( $\text{g mol}^{-1}$ )    | 300             | 500             | 800              |
| Lipophilicity (Log P)                       | 3               | 5               | 6.5              |
| Hydrogen bond donors (HD)                   | 3               | 5               | 7                |
| Hydrogen bond acceptors (HA)                | 3               | 10              | 15               |
| Polar surface area ( $\text{\AA}^2$ ) (PSA) | 60              | 140             | 180              |
| Rotatable bonds (RB)                        | 3               | 10              | 17               |

From: F. Zhu, G. Logan and J. Reynisson, *Mol. Inf.*, 2012, **31**, 847 – 855.

**Table S2.** The single point and zero point corrected vibrational energies (ZPE) of the optimised structures in hartrees (a.u.) in vacuum and the water simulation.

| Systems                     | Energy/a.u.    | ZPE/a.u. <sup>a</sup> |
|-----------------------------|----------------|-----------------------|
| TOTA                        | -955.2029309   | 0.224701798           |
| TOTA-OH                     | -1031.260384   | 0.238076414           |
| TOTA-OMe                    | -1070.570969   | 0.265710949           |
| TOTA-OEt                    | -1109.901788   | 0.293392543           |
| H2O                         | -76.46027328   | 0.020869775           |
| MeOH                        | -115.7697717   | 0.050232755           |
| EtOH                        | -155.1011875   | 0.078276116           |
| OH-                         | -75.82828128   | 0.008394185           |
| ADOTA                       | -935.35602     | 0.237645              |
| ADOTA-OH                    | -1011.399941   | 0.250434              |
| Pr-ADOTA                    | -1053.327744   | 0.321139              |
| Pr-ADOTA-OH                 | -1129.366377   | 0.334043              |
| Pr-DAOTA                    | -1151.447754   | 0.417432751           |
| Pr-DAOTA-OH                 | -1227.467945   | 0.429870106           |
| TATA                        | -1249.563617   | 0.514108034           |
| TATA-OH                     | -1325.568916   | 0.525793422           |
| ADOTA (-H <sup>+</sup> )    | -934.951629174 | 0.2240125764          |
| Pyridine                    | -248.364687468 | 0.0869879508          |
| Pyridine (+H <sup>+</sup> ) | -248.733067049 | 0.1008694344          |
| Water simulation            |                |                       |
| TOTA                        | -955.2635867   | 0.224429246           |
| TOTA-OH                     | -1031.269384   | 0.237643078           |
| TOTA-OMe                    | -1070.578412   | 0.265710949           |
| TOTA-OEt                    | -1109.909028   | 0.292959206           |
| H2O                         | -76.46783158   | 0.0207835             |
| MeOH                        | -115.7752472   | 0.050202362           |
| EtOH                        | -155.1065013   | 0.0781369             |
| OH-                         | -75.96012671   | 0.008494186           |
| ADOTA                       | -935.4191645   | 0.23747739            |
| ADOTA-OH                    | -1011.412145   | 0.250241218           |
| Pr-ADOTA                    | -1053.385937   | 0.320866292           |
| Pr-ADOTA-OH                 | -1129.377098   | 0.333617375           |
| Pr-DAOTA                    | -1151.503448   | 0.416992552           |
| Pr-DAOTA-OH                 | -1227.480123   | 0.42934167            |
| TATA                        | -1249.623951   | 0.513074693           |
| TATA-OH                     | -1325.59104074 | 0.525374791           |

<sup>a</sup> Corrected values (Wong).
